# Supplementary material for: Effects of occupation on hearing in older adults: A Sri Lankan perspective
Source: Research Square preprint supplement (doi:10.21203/rs.3.rs-8568219/v1), 2026-01-21
Supplement: Supplementary file 1 [file 128d8d30f008494a81af509e.pdf]

## **Factors associated with hearing impaired elderly in RDHS area Colombo**

### ***Questionnaire for the assessment of factors associated with hearing impaired elderly in RDHS area Colombo***

Serial Number:

Name of the DS division:

Name of the interviewer:

Name of the GN area:

Date of the interview:

-----

*Read out to the respondent.*

*“I would like to ask some questions related to your past and present. The information you give is confidential and you have the freedom to refuse any of the questions you want. The information you provide is very important and try to answer sincerely and as accurately as possible. This is not a test. There are no “right” or “wrong” answers. What you tell is completely confidential and only the researchers will have access to the completed forms. If you do not understand any questions, please tell me. We are using only elders over the age 65 years for the study”*

*Mark the responses in the relevant box by a cross (x) or write the answer in the space given. Where more than one option has to be obtained, please indicate that to the respondent.*

.....

#### **Part 1**

##### **Section 1**

##### **Section(A): Demographic and Socio-economic characteristics of the participants**

*The following questions are about the personal details of the participants.*

*Read to the respondents:*

*“I would like to ask you some questions about yourself. Please provide me the correct answer for the best of your knowledge”*

1. When is your date of Birth?

2. Are you a Male or a Female?

|    |        |   |
|----|--------|---|
| a. | Male   | 1 |
| b. | Female | 2 |

3. Which ethnic group do you belong to?

|    |           |   |
|----|-----------|---|
| c. | Sinhalese | 1 |
| d. | Tamil     | 2 |
| e. | Muslim    | 3 |
| f. | Other     | 4 |

4. What is your religion?

|    |           |   |
|----|-----------|---|
| a. | Buddhism  | 1 |
| b. | Islam     | 2 |
| c. | Hindu     | 3 |
| d. | Christian | 4 |
| e. | Other     | 5 |

5. What is your highest level of education?

|    |                     |   |
|----|---------------------|---|
| a. | No formal education | 1 |
| b. | Grade 1 -5          | 2 |
| c. | Grade 6 – 10        | 3 |

|    |                                  |   |
|----|----------------------------------|---|
| d. | Ordinary Level completed         | 4 |
| e. | Advanced level completed         | 5 |
| f. | Technical / vocational / diploma | 6 |
| g. | University and higher            | 7 |

6. What is your current marital status?

|    |                                 |   |
|----|---------------------------------|---|
|    | Unmarried                       | 1 |
| b. | Married                         | 2 |
| c. | Unmarried and living together   | 3 |
| d. | Married but separated/ divorced | 4 |
| e. | Widowed                         | 5 |

### **Section “B”: Family and social characteristics**

*The following questions are about the information of the family of the participants.*

*Read to the respondents:*

*“I would like to ask you some questions about your family. Please provide me the correct answer for the best of your knowledge”*

7. With whom are you living?

|    |               |   |
|----|---------------|---|
| a. | Living alone  | 1 |
| b. | With spouse   | 2 |
| c. | With Children | 3 |

|    |                               |   |
|----|-------------------------------|---|
| d. | With spouse & children        | 4 |
| e. | With other relative / friends | 5 |

### Section “C”: Economical status of the participant

*Read to the respondent.*

*“Now, I will be asking the questions regarding your income and financial status. Don’t be afraid to answer.”*

8. What is your employment status?

|    |                                |   |
|----|--------------------------------|---|
| a. | Unemployed                     | 1 |
| b. | On a contract basis/ Temporary | 2 |

|    |                                 |   |
|----|---------------------------------|---|
| c. | Self-Employment                 | 3 |
| d. | Pensioner                       | 4 |
| e. | Pensioner but currently working | 5 |

9. What is your average income (personal income) for a month?

|    |                        |   |
|----|------------------------|---|
| a. | None                   | 1 |
| b. | $\leq 20,000$ Rupees   | 2 |
| c. | 21,000 – 29,000 Rupees | 3 |
| d. | 30,000 – 49 000 Rupees | 4 |

|    |                        |   |
|----|------------------------|---|
| e. | 50,000 – 99,000 Rupees | 5 |
| f. | >=100,000 Rupees       | 6 |

## Part 2

- Occupational exposure

*Read to the respondent.*

*“I am now asking some information about your work environments now and during your working life in the past.”*

| Have you been working on a regular basis or any of the following places? | (Yes/No)<br>(a)           | Number of years worked/working in this environment (b) | Total duration of time per day working in this environment approximately (c) |
|--------------------------------------------------------------------------|---------------------------|--------------------------------------------------------|------------------------------------------------------------------------------|
| 10. Where painting or paint mixing, or paint manufacturing taken place?  | Yes,<br><i>Go to b, c</i> | Years                                                  | <6 hours                                                                     |
|                                                                          |                           |                                                        | >=6 hours                                                                    |
|                                                                          | No <i>Go to 11</i>        |                                                        |                                                                              |
| 11. Where fiberglass is manufactured, stored, or handled?                | Yes,<br><i>Go to b, c</i> | Years                                                  | <6 hours                                                                     |
|                                                                          |                           |                                                        | >=6 hours                                                                    |
|                                                                          | No <i>Go to 12</i>        |                                                        |                                                                              |
|                                                                          |                           | Years                                                  | <6 hours                                                                     |

|                                                                                                          |                                     |  |       |  |           |
|----------------------------------------------------------------------------------------------------------|-------------------------------------|--|-------|--|-----------|
| 12. Where chemicals such as thinner, floor/tile cleaners) are manufactured or handled?                   | Yes,<br><i>Go to</i><br><i>b, c</i> |  |       |  | >=6 hours |
|                                                                                                          | No <i>Go to 13</i>                  |  |       |  |           |
|                                                                                                          |                                     |  |       |  |           |
| 13. Where insecticide/pesticide/herbicide are manufactured, handled regularly, or used?                  | Yes,<br><i>Go to</i><br><i>b, c</i> |  | Years |  | <6 hours  |
|                                                                                                          |                                     |  |       |  | >=6 hours |
|                                                                                                          | No <i>Go to 14</i>                  |  |       |  |           |
| 14. Where is plastic processing or manufacturing done?                                                   | Yes,<br><i>Go to</i><br><i>b, c</i> |  | Years |  | <6 hours  |
|                                                                                                          |                                     |  |       |  | >=6 hours |
|                                                                                                          | No,<br><i>Go to 15</i>              |  |       |  |           |
| 15. Where are weapons used or close to the weapons?                                                      | Yes,<br><i>Go to</i><br><i>b, c</i> |  | Years |  | <6 hours  |
|                                                                                                          |                                     |  |       |  | >=6 hours |
|                                                                                                          | No,<br><i>Go to 16</i>              |  |       |  |           |
| 16. Where loud machines or equipment such as grinders, blending machine, shirring machine etc. involved? | Yes,<br><i>Go to</i><br><i>b, c</i> |  | Years |  | <6 hours  |
|                                                                                                          |                                     |  |       |  | >=6 hours |
|                                                                                                          | No <i>Go to 17</i>                  |  |       |  |           |

|                                                                                                                 |                              |  |       |           |          |
|-----------------------------------------------------------------------------------------------------------------|------------------------------|--|-------|-----------|----------|
| 17. Where you need to drive heavy vehicles such as tractors, trucks etc.                                        | 46 Yes,<br><i>Go to b, c</i> |  | Years |           | <6 hours |
|                                                                                                                 |                              |  |       | >=6 hours |          |
|                                                                                                                 | No <i>Go to 18</i>           |  |       |           |          |
| 18. Where you need to ride boats, aircrafts etc.                                                                | Yes,<br><i>Go to b, c</i>    |  | Years |           | <6 hours |
|                                                                                                                 |                              |  |       | >=6 hours |          |
|                                                                                                                 | No,<br><i>Go to 19</i>       |  |       |           |          |
| 19. Where exposed to heavy traffic throughout the day?                                                          | Yes,<br><i>Go to b, c</i>    |  | Years |           | <6 hours |
|                                                                                                                 |                              |  |       | >=6 hours |          |
|                                                                                                                 | No,<br><i>Go to 20</i>       |  |       |           |          |
| 20. Where metal products manufacturing plants (grinders, blending machines, shirring)?                          | Yes,<br><i>Go to b, c</i>    |  | Years |           | <6 hours |
|                                                                                                                 |                              |  |       | >=6 hours |          |
|                                                                                                                 | No,<br><i>Go to 21</i>       |  |       |           |          |
| 21. Where regular exposed to sound of loud musical instruments such as drums, violins etc. in open environment? | Yes,<br><i>Go to b, c</i>    |  | Years |           | <6 hours |
|                                                                                                                 |                              |  |       | >=6 hours |          |
|                                                                                                                 | No <i>Go to 22</i>           |  |       |           |          |

|                                                               |                           |  |       |  |           |
|---------------------------------------------------------------|---------------------------|--|-------|--|-----------|
| 22.Where close to sewing machine or operating sewing machine? | Yes,<br><i>Go to b, c</i> |  | Years |  | <6 hours  |
|                                                               |                           |  |       |  | >=6 hours |
|                                                               | No <i>Go to 23</i>        |  |       |  |           |
| 23.Where power tools (such as drilling machine) used?         | Yes,<br><i>Go to b, c</i> |  | Years |  | <6 hours  |
|                                                               |                           |  |       |  | >=6 hours |
|                                                               | No <i>Go to 24</i>        |  |       |  |           |
|                                                               |                           |  |       |  | <6 hours  |
|                                                               |                           |  |       |  | >=6 hours |

- **Recreational exposure**

*Read to respondent.*

*“Now I am going to ask some information about your leisure activities during your life in the past.”*

| Leisure activity                                                                      | Response |               | a)<br>Frequency | b) Number<br>of years |  |
|---------------------------------------------------------------------------------------|----------|---------------|-----------------|-----------------------|--|
| 24. Have been playing musical instrument such as drums, violin in closed environment? | Yes      | Go to<br>a, b | <6 hours        |                       |  |
|                                                                                       |          |               |                 |                       |  |
|                                                                                       |          |               | >=6 hours       |                       |  |



|                                                                         |     |             |           |  |  |
|-------------------------------------------------------------------------|-----|-------------|-----------|--|--|
|                                                                         |     |             |           |  |  |
|                                                                         | No  | Go to 25    |           |  |  |
| 25. Have you been listening to TV/ radio program or in a regular basis? | Yes | Go to a, b, | <4 hours  |  |  |
|                                                                         |     |             | >=4 hours |  |  |
|                                                                         | No  |             |           |  |  |
